# Supplementary material
Source: Frontiers journal article supplement (https://www.frontiersin.org/articles/347520)
Supplement: Presentation_1.pdf [file Presentation_1.pdf]

## Supplement

**Content**

## Analysis with all five measured emotions

- Correlations
- MANOVA with emotions as dependent variable
- Process model including all five emotions as mediators

## Data collected before the introduction of the like button (time 1 sample)

- MANOVA with pride and envy as dependent variable
- ANOVA with moving-up motivation as dependent variable
- Process model including all five emotions as mediators

## Data collected after the introduction of the like button (time 2 sample)

- ANOVA with moving-up motivation as dependent variable (measured also in the no achievement condition)

## Exploratory analysis

- Use of the like-button

**Analysis with all five measured emotions**

Table 1: Correlations of emotions and motivation

|               | 1       | 2       | 3       | 4       | 5       |
|---------------|---------|---------|---------|---------|---------|
| 1. happiness  |         |         |         |         |         |
| 2. pride      | .62***  |         |         |         |         |
| 3. depression | -.71*** | -.56*** |         |         |         |
| 4. anger      | -.43*** | -.35*** | .46***  |         |         |
| 5. envy       | -.53*** | -.42*** | .59***  | .64***  |         |
| 6. motivation | .42***  | .44**   | -.41*** | -.21*** | -.28*** |

Note: \*  $p < .05$ , \*\*  $p < .01$ , \*\*\*  $p < .001$

**MANOVA with emotions as dependent variable**

A MANOVA with achievement group (none, personal, other's) and time of data collection (before vs. after the introduction of the like button) as the independent variables and the five emotions as dependent variables revealed only a significant multivariate effect of achievement group, Pillai's trace = .10,  $F(10,890) = 4.78$ ,  $p < .001$ ,  $\eta_p^2 = .05$ . The effect of time of data collection, Pillai's trace = .003,

$F(5,444) = 0.26$ ,  $p = .935$ ,  $\eta_p^2 = .003$  and the interaction effect, Pillai's trace = .014,  $F(10,896) = 0.643$ ,  $p = .777$ ,  $\eta_p^2 = .007$ , were not significant. As can be seen in Table 2, univariate tests showed significant effects for four of the five emotions.

Table 2: Means (and standard deviations) of emotions depending as a function of achievement group

|            | None                      | Other                    | Personal                 | F     | p     | $\eta_{part}^2$ |
|------------|---------------------------|--------------------------|--------------------------|-------|-------|-----------------|
| happiness  | 4.45 <sub>a</sub> (1.19)  | 4.60 <sub>a</sub> (1.19) | 4.98 <sub>b</sub> (1.10) | 5.74  | .003  | .025            |
| pride      | 4.17 <sub>a</sub> (.88)   | 4.33 <sub>a</sub> (.93)  | 4.86 <sub>b</sub> (1.04) | 16.24 | <.001 | .068            |
| depression | 3.53 <sub>a</sub> (1.14)  | 3.49 <sub>a</sub> (1.07) | 3.19 <sub>a</sub> (1.19) | 3.04  | .049  | .013            |
| anger      | 2.69 <sub>a</sub> (1.34)  | 2.79 <sub>a</sub> (1.24) | 2.66 <sub>a</sub> (1.25) | 0.48  | .621  | .002            |
| envy       | 2.96 <sub>ab</sub> (1.20) | 3.34 <sub>a</sub> (1.34) | 2.93 <sub>b</sub> (1.13) | 5.04  | .007  | .022            |

Note: Means within a row not sharing the same subscript are significantly different at  $p < .05$  (Bonferroni-corrected comparisons)

With regard to H1, we found that respondents experienced more envy when someone else had reached an achievement than when they themselves reached an achievement; here, the control group fell non-significantly between the other two groups. However, a planned comparison with a Welsh's t-test (controlling for unequal cell sizes and inhomogeneous variances) revealed that envy was higher in the others' achievement group than in the two other groups, *Welshs*  $F(1, 449.01) = 11.08$ ,  $p < .001$ . In line with H2, people who were exposed to a personal achievement felt more proud (and also happier) than people who saw no achievement or the achievement of another person. No significant effects were found for anger. Although the main effect on depression was significant, the pairwise comparison between personal and other's achievement reached only marginal significance.

## Process model

To test whether the emotions mediate the effects of source of achievement on motivation we used Process by Hayes (2013). We used *model 4*, a model with several parallel mediators. Testing the role of all five discrete motivations simultaneously is a stronger test of the proposed underlying processes, especially since the emotions are correlated with each other (see Table 1). Source of comparison was used as the independent variable, motivation as the dependent variable. The five emotions were entered as mediators. Benign and malicious envy were entered as covariates. We opted for 10.000 bootstrapping samples.

PROCESS OUTPUT (variables have been renamed)

Run MATRIX procedure:

\*\*\*\*\* PROCESS Procedure for SPSS Release 2.16.3 \*\*\*\*\*

Written by Andrew F. Hayes, Ph.D. [www.afhayes.com](http://www.afhayes.com)

Documentation available in Hayes (2013). [www.guilford.com/p/hayes3](http://www.guilford.com/p/hayes3)

\*\*\*\*\*

Model = 4

Y = motivati

X = who

M1 = pride

M2 = envy

70 M3 = happiness

71 M4 = depression

72 M5 = anger

73

74 Statistical Controls:

75 CONTROL= benign malicious (process only takes 8 letters: stands for trait benign envy and trait malicious  
76 envy)

77

78 Sample size

79 342

80

81 \*\*\*\*\*

82 Outcome: pride

83

84 Model Summary

| 85 | R     | R-sq  | MSE   | F       | df1    | df2      | p     |
|----|-------|-------|-------|---------|--------|----------|-------|
| 86 | .3106 | .0965 | .9235 | 12.0327 | 3.0000 | 338.0000 | .0000 |

87

88 Model

| 89 |          | coeff  | se    | t       | p     | LLCI   | ULCI   |
|----|----------|--------|-------|---------|-------|--------|--------|
| 90 | constant | 5.1762 | .2685 | 19.2760 | .0000 | 4.6480 | 5.7044 |
| 91 | source   | -.5368 | .1125 | -4.7735 | .0000 | -.7580 | -.3156 |
| 92 | benign   | .1562  | .0497 | 3.1416  | .0018 | .0584  | .2540  |
| 93 | maliciou | -.1443 | .0520 | -2.7768 | .0058 | -.2465 | -.0421 |

94

95 \*\*\*\*\*

96 Outcome: envy

97

98 Model Summary

| 99  | R     | R-sq  | MSE    | F       | df1    | df2      | p     |
|-----|-------|-------|--------|---------|--------|----------|-------|
| 100 | .3425 | .1173 | 1.5040 | 14.9691 | 3.0000 | 338.0000 | .0000 |

101

102 Model

| 103 |          | coeff  | se    | t      | p     | LLCI  | ULCI   |
|-----|----------|--------|-------|--------|-------|-------|--------|
| 104 | constant | 1.5961 | .3427 | 4.6578 | .0000 | .9221 | 2.2701 |

|     |          |       |       |        |       |        |       |
|-----|----------|-------|-------|--------|-------|--------|-------|
| 105 | source   | .3894 | .1435 | 2.7132 | .0070 | .1071  | .6716 |
| 106 | benign   | .0117 | .0634 | .1841  | .8541 | -.1131 | .1365 |
| 107 | maliciou | .3848 | .0663 | 5.8028 | .0000 | .2544  | .5153 |

108

109 \*\*\*\*\*

110 Outcome: happiness

111

112 Model Summary

|     |       |       |        |        |        |          |       |
|-----|-------|-------|--------|--------|--------|----------|-------|
| 113 | R     | R-sq  | MSE    | F      | df1    | df2      | p     |
| 114 | .2697 | .0727 | 1.2890 | 8.8356 | 3.0000 | 338.0000 | .0000 |

115

116 Model

|     |          |        |       |         |       |        |        |
|-----|----------|--------|-------|---------|-------|--------|--------|
| 117 | coeff    | se     | t     | p       | LLCI  | ULCI   |        |
| 118 | constant | 5.4920 | .3172 | 17.3120 | .0000 | 4.8680 | 6.1160 |
| 119 | source   | -.3496 | .1329 | -2.6318 | .0089 | -.6110 | -.0883 |
| 120 | benign   | .1247  | .0587 | 2.1232  | .0345 | .0092  | .2402  |
| 121 | maliciou | -.2642 | .0614 | -4.3038 | .0000 | -.3850 | -.1435 |

122

123 \*\*\*\*\*

124 Outcome: depression

125

126 Model Summary

|     |       |       |        |         |        |          |       |
|-----|-------|-------|--------|---------|--------|----------|-------|
| 127 | R     | R-sq  | MSE    | F       | df1    | df2      | p     |
| 128 | .2910 | .0847 | 1.1612 | 10.4269 | 3.0000 | 338.0000 | .0000 |

129

130 Model

|     |          |        |       |         |       |        |        |
|-----|----------|--------|-------|---------|-------|--------|--------|
| 131 | coeff    | se     | t     | p       | LLCI  | ULCI   |        |
| 132 | constant | 2.7762 | .3011 | 9.2200  | .0000 | 2.1839 | 3.3685 |
| 133 | source   | .2827  | .1261 | 2.2416  | .0256 | .0346  | .5307  |
| 134 | benign   | -.1483 | .0557 | -2.6597 | .0082 | -.2579 | -.0386 |
| 135 | maliciou | .2873  | .0583 | 4.9305  | .0000 | .1727  | .4020  |

136

137 \*\*\*\*\*

138 Outcome: anger

139

## 140 Model Summary

| 141 | R     | R-sq  | MSE    | F      | df1    | df2      | p     |
|-----|-------|-------|--------|--------|--------|----------|-------|
| 142 | .2243 | .0503 | 1.4702 | 5.9688 | 3.0000 | 338.0000 | .0006 |

143

## 144 Model

| 145 |          | coeff  | se    | t      | p     | LLCI   | ULCI   |
|-----|----------|--------|-------|--------|-------|--------|--------|
| 146 | constant | 1.9835 | .3388 | 5.8545 | .0000 | 1.3171 | 2.6500 |
| 147 | source   | .1344  | .1419 | .9473  | .3442 | -.1447 | .4135  |
| 148 | benign   | -.0276 | .0627 | -.4408 | .6597 | -.1510 | .0957  |
| 149 | maliciou | .2660  | .0656 | 4.0563 | .0001 | .1370  | .3950  |

150

151 \*\*\*\*\*

## 152 Outcome: motivation

153

## 154 Model Summary

| 155 | R     | R-sq  | MSE    | F       | df1    | df2      | p     |
|-----|-------|-------|--------|---------|--------|----------|-------|
| 156 | .5546 | .3076 | 1.0659 | 18.4934 | 8.0000 | 333.0000 | .0000 |

157

## 158 Model

| 159 |            | coeff  | se    | t       | p     | LLCI   | ULCI   |
|-----|------------|--------|-------|---------|-------|--------|--------|
| 160 | constant   | 1.4004 | .7139 | 1.9617  | .0506 | -.0039 | 2.8048 |
| 161 | pride      | .2834  | .0754 | 3.7601  | .0002 | .1352  | .4317  |
| 162 | envy       | -.0095 | .0658 | -.1438  | .8858 | -.1388 | .1199  |
| 163 | happiness  | .2320  | .0726 | 3.1964  | .0015 | .0892  | .3747  |
| 164 | depression | -.0710 | .0797 | -.8908  | .3737 | -.2279 | .0858  |
| 165 | anger      | .0416  | .0601 | .6921   | .4893 | -.0767 | .1599  |
| 166 | source     | -.1304 | .1254 | -1.0399 | .2991 | -.3770 | .1163  |
| 167 | benign     | .2846  | .0547 | 5.1990  | .0000 | .1769  | .3923  |
| 168 | maliciou   | -.1287 | .0589 | -2.1848 | .0296 | -.2447 | -.0128 |

169

170 \*\*\*\*\* DIRECT AND INDIRECT EFFECTS \*\*\*\*\*

171

## 172 Direct effect of X on Y

| 173 | Effect | SE    | t       | p     | LLCI   | ULCI  |
|-----|--------|-------|---------|-------|--------|-------|
| 174 | -.1304 | .1254 | -1.0399 | .2991 | -.3770 | .1163 |

175

176 Indirect effect of X on Y

177 Effect Boot SE BootLLCI BootULCI

178 TOTAL -.2514 .0764 -.4189 -.1156

179 pride -.1521 .0543 -.2820 -.0657

180 envy -.0037 .0294 -.0654 .0539

181 happiness -.0811 .0383 -.1807 -.0233

182 depression -.0201 .0279 -.1022 .0149

183 anger .0056 .0157 -.0106 .0642

184

185 \*\*\*\*\* ANALYSIS NOTES AND WARNINGS \*\*\*\*\*

186

187 Number of bootstrap samples for bias corrected bootstrap confidence intervals:

188 10000

189

190 Level of confidence for all confidence intervals in output:

191 95.00

192

193 NOTE: Some cases were deleted due to missing data. The number of such cases was:

194 140

195

196

197 The effects of achievement source on the five emotions, the effects of the emotions on moving-up motivation,  
 198 the effects of trait benign and malicious envy on moving-up motivation and the direct effect of achievement  
 199 source on moving-up motivation are also displayed in the Figure (coefficient and 95% CI):

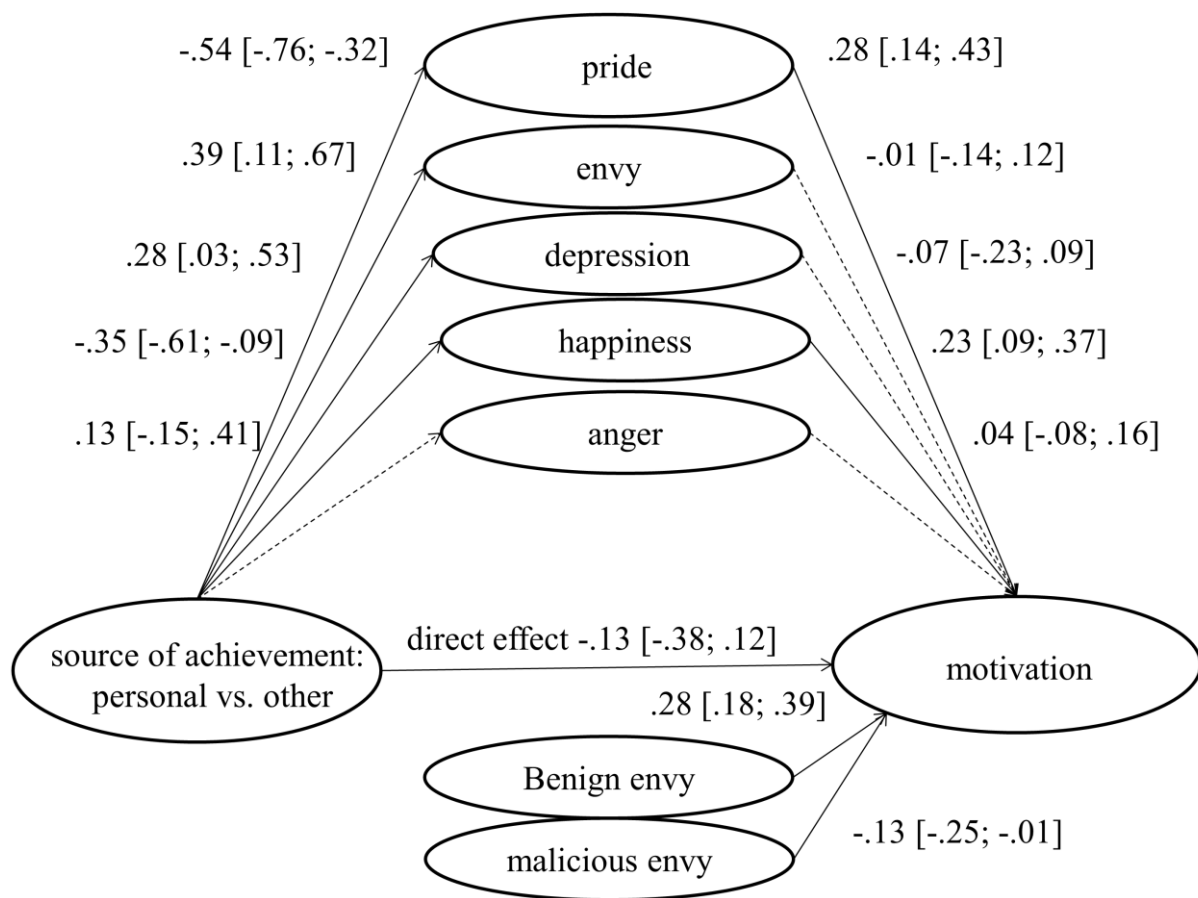

200

201

202 Indirect effect via pride:  $-.15 [-.28, -.07]$ 203 Indirect effect via happiness:  $-.08 [-.18, -.02]$ 

204 Additionally, trait benign envy also was related to higher levels of pride and happiness and lower levels of  
 205 depression (see Process output for coefficients). Malicious envy was correlated to all five emotions. The higher  
 206 trait malicious envy, the more envy, depression and anger and the less pride and happiness were reported.

## Data collected before the introduction of the like button

**Effect on emotions.** A MANOVA with achievement group (none, personal, other's) as the independent variable and pride and envy as dependent variables revealed a significant multivariate effect of achievement group, Pillai's trace = .11,  $F(4,460) = 6.73$ ,  $p < .001$ ,  $\eta_p^2 = .09$ . Respondents in the personal achievement group reported higher levels of pride ( $M = 4.88$ ) than people in the other's achievement group ( $M = 4.31$ ) or the control group ( $M = 4.06$ ). The latter two groups did not significantly differ from each other (Bonferroni-protected comparisons). The univariate effect for pride was significant,  $F(2,230) = 11.97$ ,  $p < .001$ ,  $\eta_p^2 = .03$ . The univariate effect for envy was also significant,  $F(2,230) = 3.47$ ,  $p = .033$ ,  $\eta_p^2 = .03$ . Respondents in the other's achievement group reported higher levels of envy ( $M = 3.31$ ) than people in the personal achievement group ( $M = 2.82$ ). The no achievement group did not significantly differ ( $M = 3.06$ ), but a Welch test revealed that envy was higher in the other's achievement group than in the other two conditions,  $F(1,217.42) = 6.39$ ,  $p < .05$ .

**Effect on motivation.** A univariate analysis of variance with source of achievement as independent variable revealed a significant effect of source,  $F(1, 196) = 5.15$ ,  $p = .024$ ,  $\eta_p^2 = .026$ . Participants were more motivated when they were exposed to their personal achievement ( $M = 4.38$ ,  $SD = 1.37$ ) than when they were exposed to someone else's achievement ( $M = 3.95$ ,  $SD = 1.14$ ).

## Mediation model.

We run model 4 from PROCESS (Hayes, 2013) with achievement source (personal vs. other) as independent variable, moving-up motivation as dependent variable, pride and envy as potential mediators and trait benign and malicious envy as covariates. We used 10000 bootstrapping samples.

The direct effect of achievement source (personal vs. other) on motivation was not significant,  $-.04$ ,  $SE = .17$ , 95% CI  $[-.38; .29]$ . There was a significant indirect effect via pride,  $-.27$ ,  $SE = .10$ , 95% CI  $[-.50; -.12]$ . The indirect effect via envy was not significant,  $-.05$ ,  $SE = .04$ , 95% CI  $[-.17; .01]$ . Benign envy was positively related to motivation,  $.34$ ,  $SE = .07$ , 95% CI  $[.19; .48]$ . Malicious envy in contrast was negatively related to motivation,  $-.20$ ,  $SE = .07$ , 95% CI  $[-.35; -.06]$ . Trait malicious envy was negatively related to state envy,  $.26$ ,  $SE = .09$ , 95% CI  $[.09; .43]$ . No other correlations with trait benign or malicious envy were significant.



**237 Data collected after the introduction of the like button**

238 A univariate analysis of variance with achievement group (none, personal, other's) as independent  
239 variable and moving-up motivation as dependent variable revealed a significant effect of source,  $F(1,$   
240  $218) = 1.78, p = .172, \eta_p^2 = .016$ . Descriptively, participants were less motivated when they were  
241 exposed to someone else's achievement ( $M = 4.07, SD = 1.21$ ) than when they were exposed to their  
242 personal achievement ( $M = 4.41, SD = 1.16$ ) or no achievement ( $M = 4.33, SD = 1.19$ ).

**243 Exploratory analyses.**

244 **Effect of the like button.** Although time of data collection had no significant effect in the analyses of  
245 variance, we nevertheless examined the use of the like button and its relationships with our variables.  
246 The like button was not used frequently; 70.6% of the respondents who saw the achievement of  
247 another person indicated that they have not liked this achievement, and 87.2% who saw their personal  
248 achievement indicated to have not received a like. Whether people have given or received a like was  
249 uncorrelated to emotions or motivation, all  $r_s < .17, ns$ .

250

251
